# Supplementary material
Source: PubMed Central journal article supplement (PMC10388018)
Supplement: jmcp.2023.29.6.659_s001.pdf [file jmcp.2023.29.6.659_s001.pdf]

## **SUPPLEMENTARY MATERIALS**

### **Time duration and health care resource use during cancer diagnoses in the United States:**

#### **A large claims database analysis**

Matthew Gitlin, PharmD; November McGarvey, PhD, MPH; Namrata Shivaprakash, MPH, MS;  
Ze Cong, PhD, MS

**SUPPLEMENTARY TABLE 1** Cancer types included and identification codes

**SUPPLEMENTARY TABLE 2** Diagnostic test codes

**SUPPLEMENTARY TABLE 3** Index date and first diagnostic test date rationale

**SUPPLEMENTARY TABLE 4** TTD for all patients with cancer and by cancer type

**SUPPLEMENTARY TABLE 5** Diagnostic-related health care resource utilization during the diagnostic pathway by TTD among those diagnosed with bladder cancer

**SUPPLEMENTARY TABLE 6** Diagnostic-related health care resource utilization during the diagnostic pathway by TTD among those diagnosed with breast cancer

**SUPPLEMENTARY TABLE 7** Diagnostic-related health care resource utilization during the diagnostic pathway by TTD among those diagnosed with colorectal cancer

**SUPPLEMENTARY TABLE 8** Diagnostic-related health care resource utilization during the diagnostic pathway by TTD among those diagnosed with lung cancer

**SUPPLEMENTARY TABLE 9** Diagnostic-related health care resource utilization during the diagnostic pathway by TTD among those diagnosed with ovarian cancer

**SUPPLEMENTARY TABLE 10** Diagnostic-related health care resource utilization during the diagnostic pathway by TTD among those diagnosed with pancreas cancer

**SUPPLEMENTARY TABLE 11** Diagnostic-related health care resource utilization during the diagnostic pathway by TTD among those diagnosed with prostate cancer

**Supplemental Table 1. Cancer Types Included and Identification Codes**

| <b>Cancer Type</b>                                 | <b>ICD-10-CM Diagnosis Codes</b>       |
|----------------------------------------------------|----------------------------------------|
| Anal                                               | C21.x                                  |
| Bladder (including urinary bladder and urothelial) | C65.x, C66.x, C67.x                    |
| Breast                                             | C50.xxx                                |
| Cervical                                           | C53.x                                  |
| Colorectal                                         | C18.x, C19, C20                        |
| Esophagus                                          | C15.x                                  |
| Gallbladder                                        | C23                                    |
| Head and neck                                      | C76.x                                  |
| Kidney                                             | C64.x                                  |
| Leukemias                                          | C91.xx, C92.xx, C93.xx, C94.xx         |
| Liver (including bile duct)                        | C22.x, C78.x                           |
| Lung (including bronchus)                          | C34.xx                                 |
| Lymphomas                                          | C81.xx, C82.xx, C83.xx, C84.xx, C85.xx |
| Multiple myeloma                                   | C90.xx                                 |
| Ovarian                                            | C56.x                                  |
| Pancreas                                           | C25.x                                  |
| Prostate                                           | C61                                    |
| Stomach                                            | C16.x                                  |
| Thyroid                                            | C73                                    |
| Uterus                                             | C54.x, C55                             |

**Supplemental Table 2. Diagnostic Test Codes**

| Diagnostic-related HRU Category                                                                                                                                                                                                                                                                                                                                                                                                                                                                               | CPT Codes                                                                                                                                                                                                                                                                                                                                                                                                                                                                                                                                                                                                                                                                                                                                                                                                                                                                                                                                                                                                                                                                                                                                                                                                                     |
|---------------------------------------------------------------------------------------------------------------------------------------------------------------------------------------------------------------------------------------------------------------------------------------------------------------------------------------------------------------------------------------------------------------------------------------------------------------------------------------------------------------|-------------------------------------------------------------------------------------------------------------------------------------------------------------------------------------------------------------------------------------------------------------------------------------------------------------------------------------------------------------------------------------------------------------------------------------------------------------------------------------------------------------------------------------------------------------------------------------------------------------------------------------------------------------------------------------------------------------------------------------------------------------------------------------------------------------------------------------------------------------------------------------------------------------------------------------------------------------------------------------------------------------------------------------------------------------------------------------------------------------------------------------------------------------------------------------------------------------------------------|
| <b>Imaging</b>                                                                                                                                                                                                                                                                                                                                                                                                                                                                                                |                                                                                                                                                                                                                                                                                                                                                                                                                                                                                                                                                                                                                                                                                                                                                                                                                                                                                                                                                                                                                                                                                                                                                                                                                               |
| CT                                                                                                                                                                                                                                                                                                                                                                                                                                                                                                            | 0042T, 0501T, 0502T, 0503T, 0504T, 0554T, 0555T, 0556T, 0557T, 0558T, 0633T, 0634T, 0635T, 0636T, 0637T, 0638T, 61751, 62284, 64451, 64625, 70450, 70460, 70470, 70480, 70481, 70482, 70486, 70487, 70488, 70490, 70491, 70492, 71250, 71260, 71270, 71271, 71275, 72125, 72126, 72127, 72128, 72129, 72130, 72131, 72132, 72133, 72191, 72192, 72193, 72194, 73200, 73201, 73202, 73560, 73562, 73700, 73701, 73702, 74150, 74160, 74170, 74174, 74175, 74176, 74177, 74178, 74261, 74262, 74263, 75571, 75572, 75573, 75635, 75989, 76376, 76377, 76380, 76497, 77011, 77012, 77013, 77014, 77078, 78072, 78830, 78832                                                                                                                                                                                                                                                                                                                                                                                                                                                                                                                                                                                                      |
| MRI                                                                                                                                                                                                                                                                                                                                                                                                                                                                                                           | S8037, 70336, 70540, 70542, 70543, 70544, 70547, 70549, 70551, 70552, 70553, 72141, 72146, 72156, 72157, 72158, 72159, 72195, 72196, 72197, 72198, 73218, 73219, 73220, 73221, 73222, 73223, 73225, 73718, 73719, 73720, 73721, 73722, 73723, 73725, 74181, 74182, 74183, 74185, 75557, 75559, 75561, 75563, 75565, 76376, 76377, 76390, 76391, 76498, 77049                                                                                                                                                                                                                                                                                                                                                                                                                                                                                                                                                                                                                                                                                                                                                                                                                                                                  |
| Nuclear Medicine (including imaging [thyroid, parathyroid, adrenal, bone marrow, spleen, lymphatic and lymph nodes, liver, spleen, hepatobiliary system, salivary, gastric mucosa, gastric emptying, acute gastrointestinal blood loss, intestine, bone and/or joint, non-cardiac vascular flow, myocardial perfusion, acute venous thrombosis, myocardial, cardiac blood pool, pulmonary ventilation, brain, cerebrospinal fluid flow, kidney, testicular] and other diagnostic nuclear medicine procedures) | 78012, 78013, 78014, 78015, 78016, 78018, 78020, 78070, 78071, 78072, 78075, 78099, 78102, 78103, 78104, 78110, 78111, 78120, 78121, 78122, 78130, 78140, 78185, 78191, 78195, 78199, 78201, 78202, 78215, 78216, 78226, 78227, 78230, 78231, 78232, 78258, 78261, 78262, 78264, 78265, 78266, 78267, 78268, 78278, 78282, 78290, 78291, 78299, 78300, 78305, 78306, 78315, 78350, 78351, 78399, 78414, 78428, 78445, 78451, 78452, 78453, 78454, 78456, 78457, 78458, 78459, 78466, 78468, 78469, 78472, 78473, 78481, 78483, 78491, 78492, 78494, 78496, 78499, 78579, 78580, 78582, 78597, 78598, 78599, 78600, 78601, 78605, 78606, 78608, 78609, 78610, 78630, 78635, 78645, 78650, 78660, 78699, 78700, 78701, 78707, 78708, 78709, 78725, 78730, 78740, 78761, 78799, 78800, 78801, 78802, 78803, 78804, 78808, 78830, 78831, 78832, 78835, 78999                                                                                                                                                                                                                                                                                                                                                                      |
| PET                                                                                                                                                                                                                                                                                                                                                                                                                                                                                                           | 78429, 78430, 78431, 78433, 78811, 78812, 78813                                                                                                                                                                                                                                                                                                                                                                                                                                                                                                                                                                                                                                                                                                                                                                                                                                                                                                                                                                                                                                                                                                                                                                               |
| PET-CT                                                                                                                                                                                                                                                                                                                                                                                                                                                                                                        | 78814, 78815, 78816                                                                                                                                                                                                                                                                                                                                                                                                                                                                                                                                                                                                                                                                                                                                                                                                                                                                                                                                                                                                                                                                                                                                                                                                           |
| Radiology (including radiological examinations, x-rays, angiograms, mammograms, lymphangiography, shuntogram, splenoportography, and venography)                                                                                                                                                                                                                                                                                                                                                              | 0348T, 0349T, 0350T, 36251, 36252, 36253, 36254, 70030, 70100, 70110, 70120, 70130, 70134, 70140, 70150, 70160, 70190, 70200, 70210, 70220, 70240, 70250, 70260, 70300, 70310, 70320, 70328, 70330, 70355, 70360, 70370, 70380, 71045, 71046, 71047, 71048, 71100, 71101, 71110, 71111, 71120, 71130, 72020, 72040, 72050, 72052, 72070, 72072, 72074, 72080, 72081, 72082, 72083, 72084, 72100, 72110, 72114, 72120, 72170, 72190, 72200, 72202, 72220, 73000, 73010, 73020, 73030, 73040, 73050, 73060, 73070, 73080, 73085, 73090, 73092, 73100, 73110, 73115, 73120, 73130, 73140, 73501, 73502, 73503, 73521, 73522, 73523, 73525, 73551, 73552, 73560, 73562, 73564, 73565, 73580, 73590, 73592, 73600, 73610, 73615, 73620, 73630, 73650, 73660, 74018, 74019, 74021, 74022, 74210, 74220, 74221, 74230, 74240, 74241, 74245, 74246, 74247, 74248, 74249, 74250, 74251, 74270, 74280, 74400, 74410, 74415, 74420, 74470, 75774, 75801, 75803, 75805, 75807, 75809, 75810, 75820, 75822, 75825, 75827, 75831, 75833, 75840, 75842, 75860, 75870, 75872, 75880, 75885, 75887, 75889, 75891, 75893, 76010, 76080, 76098, 76100, 76101, 76102, 77062, 77063, 77065, 77066, 77067, 77074, 77075, 77076, 78264, G0279, G9557 |

| Diagnostic-related HRU Category                                                                              | CPT Codes                                                                                                                                                                                                                                                                                                                                                                                                                                                                                                                                                                                                                                                                                                                                                                                                                                                                                                                                                                                                                                                                                                                                                                                                                                   |
|--------------------------------------------------------------------------------------------------------------|---------------------------------------------------------------------------------------------------------------------------------------------------------------------------------------------------------------------------------------------------------------------------------------------------------------------------------------------------------------------------------------------------------------------------------------------------------------------------------------------------------------------------------------------------------------------------------------------------------------------------------------------------------------------------------------------------------------------------------------------------------------------------------------------------------------------------------------------------------------------------------------------------------------------------------------------------------------------------------------------------------------------------------------------------------------------------------------------------------------------------------------------------------------------------------------------------------------------------------------------|
| Ultrasound                                                                                                   | 76506, 76510, 76511, 76512, 76513, 76514, 76516, 76519, 76529, 76536, 76604, 76641, 76642, 76700, 76705, 76706, 76770, 76775, 76776, 76800, 76801, 76802, 76805, 76810, 76811, 76812, 76813, 76814, 76815, 76816, 76817, 76818, 76819, 76820, 76821, 76825, 76826, 76827, 76828, 76830, 76831, 76856, 76857, 76870, 76872, 76873, 76881, 76882, 76885, 76886, 76932, 76936, 76937, 76940, 76941, 76942, 76945, 76946, 76948, 76965, 76975, 76977, 76978, 76979, 76981, 76982, 76983, 76998, 76999                                                                                                                                                                                                                                                                                                                                                                                                                                                                                                                                                                                                                                                                                                                                           |
| <b>Endoscopy</b>                                                                                             |                                                                                                                                                                                                                                                                                                                                                                                                                                                                                                                                                                                                                                                                                                                                                                                                                                                                                                                                                                                                                                                                                                                                                                                                                                             |
| Endoscopy without biopsy                                                                                     | 0288T, 0651T, 29848, 31231, 31233, 31235, 31238, 31239, 31240, 31241, 31253, 31254, 31255, 31256, 31257, 31259, 31267, 31276, 31287, 31288, 31290, 31291, 31292, 31293, 31294, 31295, 31296, 31297, 31298, 3130F, 3132F, 3140F, 3141F, 31615, 31622, 31623, 31624, 31625, 31626, 31627, 31628, 31629, 31630, 31631, 31632, 31633, 31634, 31635, 31636, 31637, 31638, 31640, 31641, 31643, 31645, 31646, 33265, 33266, 33508, 37500, 37501, 43191, 43197, 43200, 43235, 43260, 43262, 43264, 44360, 44363, 44364, 44366, 44370, 44372, 44373, 44376, 44378, 44379, 44385, 44388, 45300, 45303, 45305, 45307, 45308, 45309, 45315, 45317, 45320, 45321, 45327, 45330, 45331, 45332, 45333, 45334, 45335, 45337, 45338, 45340, 45341, 45342, 45347, 45349, 45350, 45378, 45379, 45380, 45381, 45382, 45384, 45385, 45386, 45388, 45389, 45390, 45391, 45392, 45393, 45398, 46000, 46601, 46604, 46606, 46607, 46608, 46610, 46611, 46612, 46614, 46615, 47550, 47552, 47554, 47555, 47556, 49320, 50080, 50081, 50551, 50553, 50561, 50562, 50570, 50572, 50575, 50580, 50951, 50953, 50961, 50970, 50972, 50980, 56820, 57420, 57452, 58555, 62160, 62161, 62162, 62164, 62165, 74220, 74230, 91110, 91111, 96570, 96571, G0104, G0105, G0121 |
| Endoscopy with biopsy                                                                                        | 0653T, 3126F, 3150F, 29800, 29805, 29830, 29840, 29860, 29870, 29900, 31237, 31510, 31535, 31536, 31576, 31625, 31628, 31629, 31632, 31633, 31652, 31653, 31717, 32601, 32604, 32606, 32607, 32608, 32609, 38570, 38572, 38573, 39401, 39402, 43193, 43198, 43202, 43216, 43231, 43232, 43238, 43239, 43242, 43250, 43261, 44361, 44365, 44369, 44377, 44382, 44386, 44389, 44392, 44407, 45305, 45308, 45315, 45320, 45331, 45333, 45342, 45380, 45384, 45392, 45392, 46606, 46607, 46610, 46612, 46615, 47553, 49321, 50555, 50557, 50574, 50576, 50955, 50957, 50974, 50976, 52007, 52204, 52224, 52250, 52354, 56821, 57421, 57454, 57455, 57460, 58110, 58548, 58558, 60650                                                                                                                                                                                                                                                                                                                                                                                                                                                                                                                                                            |
| <b>Biopsy</b>                                                                                                |                                                                                                                                                                                                                                                                                                                                                                                                                                                                                                                                                                                                                                                                                                                                                                                                                                                                                                                                                                                                                                                                                                                                                                                                                                             |
| Biopsy (Other biopsy included site-specific biopsy [e.g., breast or skin] as well as fine needle aspiration) | G0364, C1830, 0053U, 0087U, 0088U, 00100, 00120, 00124, 00126, 00164, 00170, 00172, 00174, 00176, 0200T, 0201T, 00322, 00454, 00522, 00702, 00792, 00940, 00942, 00944, 00948, 00950, 00952, 01112, 1160F, 3350F, 10004, 10005, 10006, 10007, 10008, 10009, 10010, 10011, 10012, 10021, 10022, 11102, 11103, 11104, 11105, 11106, 11107, 11400, 11401, 11402, 11403, 11404, 11406, 11420, 11421, 11422, 11423, 11424, 11426, 11440, 11441, 11442, 11443, 11444, 11446, 11450, 11451, 11462, 11463, 11470, 11471, 11600, 11601, 11602, 11603, 11604, 11606, 11620, 11621, 11622, 11623, 11624, 11626, 11640, 11641, 11642, 11643, 11644, 11646, 11755, 19081, 19082, 19083, 19084, 19085, 19086, 19100, 19101, 20200, 20205, 20206, 20220, 20225, 20240, 20245, 20250, 20251, 21550, 21920, 21925, 22510, 22511, 22512, 22513, 22514, 22515, 23065, 23066, 23100, 23101, 23105, 23106, 24065, 24066, 24100, 24101, 25065, 25066, 25100, 25101, 26100, 26105, 26110, 27040, 27041,                                                                                                                                                                                                                                                            |

| Diagnostic-related HRU Category   | CPT Codes                                                                                                                                                                                                                                                                                                                                                                                                                                                                                                                                                                                                                                                                                                                                                                                                                                                                                                                                                                                                                 |
|-----------------------------------|---------------------------------------------------------------------------------------------------------------------------------------------------------------------------------------------------------------------------------------------------------------------------------------------------------------------------------------------------------------------------------------------------------------------------------------------------------------------------------------------------------------------------------------------------------------------------------------------------------------------------------------------------------------------------------------------------------------------------------------------------------------------------------------------------------------------------------------------------------------------------------------------------------------------------------------------------------------------------------------------------------------------------|
|                                   | 27050, 27052, 27323, 27324, 27330, 27331, 27613, 27614, 27620, 28050, 28052, 28054, 30100, 31050, 31051, 31652, 31653, 32096, 32097, 32098, 32400, 32408, 37200, 37609, 38220, 38221, 38222, 38500, 38505, 38510, 38520, 38525, 38530, 38531, 39000, 39010, 40490, 40808, 40940, 41100, 41105, 41108, 42100, 42400, 42405, 42800, 42804, 42806, 43605, 44010, 44020, 44025, 44100, 45100, 47000, 47001, 47100, 47543, 47700, 48100, 48102, 49000, 49010, 49180, 50200, 50205, 50606, 53200, 54100, 54105, 54435, 54500, 54505, 54800, 54865, 55700, 55705, 55706, 55812, 55842, 55862, 56605, 56606, 57100, 57105, 57109, 57500, 57531, 58100, 58210, 58900, 58960, 60100, 60540, 60545, 61140, 61575, 61576, 61750, 61751, 62269, 63275, 63276, 63277, 63278, 63280, 63281, 63282, 63283, 63285, 63286, 63287, 63290, 64795, 65410, 67346, 67400, 67450, 67810, 68100, 68510, 68525, 69100, 69105, 75970, 76932, 76942, 77002, 77012, 77021, 81551, 88233, 88300, 88302, 88304, 88305, 88307, 88309, 89290, 89291, 93505 |
| <b>Laboratory</b>                 |                                                                                                                                                                                                                                                                                                                                                                                                                                                                                                                                                                                                                                                                                                                                                                                                                                                                                                                                                                                                                           |
| General urine and serum           | G0476, 0096U, 80047, 80048, 80053, 80076, 81000, 81001, 81003, 83615, 84155, 84165, 84702, 84703, 84704, 85007, 85008, 85025, 85027, 85651, 85652, 86294, 86316, 86677, 87086, 87088, 88104, 88108, 88112, 88120, 88121, 88341, 88342, 480277                                                                                                                                                                                                                                                                                                                                                                                                                                                                                                                                                                                                                                                                                                                                                                             |
| Genetic tests                     | 3170F, 81162, 81163, 81164, 81165, 81166, 81167, 81212, 81215, 81216, 81217, 81445, 81479, 81519, 87623, 87624, 87625, 88182, 88184, 88185, 88187, 88188, 88189, 88360, S3711                                                                                                                                                                                                                                                                                                                                                                                                                                                                                                                                                                                                                                                                                                                                                                                                                                             |
| Non-genetic cancer-specific tests | 82105, 82106, 82378, 84152, 84153, 84154, 86140, 86141, 86304, 86664, 86665, 480376                                                                                                                                                                                                                                                                                                                                                                                                                                                                                                                                                                                                                                                                                                                                                                                                                                                                                                                                       |

**Supplemental Table 3. Index Date and First Diagnostic Test Date Definition Rationale**

| <b>Date</b>                       | <b>Definition Rationale and Further Details</b>                                                                                                                                                                                                                                                            |
|-----------------------------------|------------------------------------------------------------------------------------------------------------------------------------------------------------------------------------------------------------------------------------------------------------------------------------------------------------|
| <b>Index date</b>                 | The look-back period was restricted to 4-weeks to reduce misattribution of the reason for the visit as being linked to signs and symptoms related to cancer. In the case that the office visit was used to identify the index date, the visit date closest to the first diagnostic test date was selected. |
| <b>First Diagnostic Test Date</b> | The 60-day gap between diagnostic tests was chosen to allow for potential scheduling delays, follow-up office visits, and other events that may have caused a delay between tests in the same diagnostic pathway.                                                                                          |

**Supplemental Table 4. TTD for All Cancer Patients and by Cancer Type**

| <b>Cancer Type</b>             | <b>N</b>       | <b>Mean (days)</b> | <b>Median (days)</b> | <b>SE (days)</b> | <b>SD (days)</b> |
|--------------------------------|----------------|--------------------|----------------------|------------------|------------------|
| <b>All Cancers<sup>a</sup></b> | <b>458,818</b> | <b>156.2</b>       | <b>118.0</b>         | <b>0.3</b>       | <b>164.9</b>     |
| Anal                           | 1,387          | 176.7              | 138.0                | 4.2              | 156.1            |
| Bladder <sup>b</sup>           | 39,949         | 121.6              | 102.0                | 0.8              | 149.3            |
| Breast                         | 120,859        | 135.5              | 100.0                | 0.4              | 130.8            |
| Cervical                       | 1,545          | 158.3              | 113.0                | 3.1              | 154.1            |
| Colorectal                     | 22,649         | 167.8              | 136.0                | 0.9              | 172.0            |
| Esophagus                      | 2,041          | 177.6              | 158.0                | 2.1              | 159.3            |
| Gallbladder                    | 385            | 170.5              | 113.0                | 9.6              | 170.7            |
| Head and Neck                  | 2,198          | 172.9              | 120.0                | 3.5              | 163.2            |
| Kidney                         | 38,322         | 157.7              | 99.0                 | 1.6              | 167.6            |
| Leukemia (Any)                 | 15,741         | 170.4              | 98.0                 | 1.5              | 187.4            |
| Liver                          | 4,201          | 181.6              | 135.0                | 3.1              | 185.3            |
| Lung <sup>c</sup>              | 59,801         | 168.2              | 100.0                | 0.6              | 164.2            |
| Lymphoma (Any)                 | 19,103         | 182.5              | 120.0                | 1.3              | 184.5            |
| Multiple Myeloma               | 5,490          | 229.0              | 194.0                | 1.9              | 119.7            |
| Ovarian                        | 4,334          | 151.5              | 115.0                | 2.1              | 179.4            |
| Pancreas                       | 3,061          | 131.2              | 90.0                 | 3.8              | 184.6            |
| Prostate                       | 88,417         | 132.6              | 91.0                 | 0.6              | 141.3            |
| Stomach                        | 1,491          | 205.7              | 161.0                | 5.2              | 154.9            |
| Thyroid                        | 18,525         | 124.6              | 81.0                 | 1.2              | 138.0            |
| Uterus                         | 9,319          | 158.7              | 106.0                | 1.6              | 154.8            |

<sup>a</sup>“All cancers” includes 20 cancer types; <sup>b</sup> Bladder includes urothelial; <sup>c</sup>Lung includes bronchus; <sup>d</sup> Liver includes bile duct

**Supplementary Table 5. Diagnostic-related Health Care Resource Utilization During the Diagnostic Pathway by TTD Among Those Diagnosed with Bladder Cancer**

| Bladder Cancer <sup>a</sup><br>N= 39,949 | Time to Diagnosis <sup>c</sup> |                        |                        |                     | Absolute Difference in % Diagnostic Resource Users “0 to 30 days” vs “>180 days” | Times Change in % Diagnostic Resource Users “0 to 30 days” vs “>180 days” |
|------------------------------------------|--------------------------------|------------------------|------------------------|---------------------|----------------------------------------------------------------------------------|---------------------------------------------------------------------------|
|                                          | 0-30 Days (N=12,996)           | >30-90 Days (N=17,603) | >90-180 Days (N=7,341) | >180 Days (N=2,009) |                                                                                  |                                                                           |
|                                          | %                              | %                      | %                      | %                   |                                                                                  |                                                                           |
| <b>Imaging<sup>b</sup></b>               |                                |                        |                        |                     |                                                                                  |                                                                           |
| CT                                       | 67.5                           | 66.9                   | 62.4                   | 97.9                | 30.4                                                                             | 1.5x                                                                      |
| PET/PET-CT                               | 1.6                            | 1.9                    | 3.5                    | 15.7                | 14.1                                                                             | 9.8x                                                                      |
| MRI                                      | 10.2                           | 9.6                    | 13.5                   | 32.8                | 22.6                                                                             | 3.2x                                                                      |
| Nuclear medicine <sup>c</sup>            | 7.3                            | 7.6                    | 11.3                   | 29.3                | 22.0                                                                             | 4.0x                                                                      |
| Radiology <sup>d</sup>                   | 76.6                           | 90.7                   | 76.9                   | 77.1                | 0.5                                                                              | 1.0x                                                                      |
| Ultrasound                               | 84.3                           | 90.5                   | 93.3                   | 81                  | -3.3                                                                             | 1.0x                                                                      |
| <b>Endoscopy</b>                         |                                |                        |                        |                     |                                                                                  |                                                                           |
| Endoscopy without biopsy                 | 22.9                           | 18.6                   | 53.5                   | 66.1                | 43.2                                                                             | 2.9x                                                                      |
| Endoscopy with biopsy                    | 14.7                           | 13.5                   | 17.7                   | 36.4                | 21.7                                                                             | 2.5x                                                                      |
| <b>Other Biopsies</b>                    |                                |                        |                        |                     |                                                                                  |                                                                           |
|                                          | 30.8                           | 28.7                   | 36.8                   | 76.1                | 45.3                                                                             | 2.5x                                                                      |
| <b>Laboratory<sup>b</sup></b>            |                                |                        |                        |                     |                                                                                  |                                                                           |
| Genetic Tests                            | 2.0                            | 1.8                    | 2.8                    | 8.5                 | 6.5                                                                              | 4.3x                                                                      |
| General urine & serum tests              | 95.8                           | 98.5                   | 98.1                   | 92.2                | -3.6                                                                             | 1.0x                                                                      |
| Non-genetic cancer-specific lab tests    | 72.4                           | 72.8                   | 73.4                   | 78.7                | 6.3                                                                              | 1.1x                                                                      |

<sup>a</sup>Bladder includes urothelial; <sup>b</sup>The number of imaging or laboratory procedures were counted as 1 if multiple claims for the same procedure or test were present on the same day; <sup>c</sup> Nuclear medicine includes imaging (thyroid, parathyroid, adrenal, bone marrow, spleen, lymphatic and lymph nodes, liver, spleen, hepatobiliary system, salivary, gastric mucosa, gastric emptying, acute gastrointestinal blood loss, intestine, bone and/or joint, non-cardiac vascular flow, myocardial perfusion, acute venous thrombosis, myocardial, cardiac blood pool, pulmonary ventilation, brain, cerebrospinal fluid flow, kidney, testicular) and other diagnostic nuclear medicine procedures (full code list in supplemental materials); <sup>d</sup>Radiology includes radiological examinations, x-rays, angiograms, mammograms, tomosynthesis, lymphangiography, shuntogram, splenoportography, and venography. <sup>e</sup> Time to diagnosis cohorts had variable follow-up periods. CT, computerized tomography; MRI, magnetic resonance imaging; PET, positron emission tomography



**Supplementary Table 6. Diagnostic-related Health Care Resource Utilization During the Diagnostic Pathway by TTD Among Those Diagnosed with Breast Cancer**

| Breast Cancer Patients Diagnosed<br>N= 120,859 | Time to Diagnosis <sup>d</sup> |                           |                           |                        | Absolute Difference in % Diagnostic Resource Users “0 to 30 days” vs “>180 days” | Times Change in % Diagnostic Resource Users “0 to 30 days” vs “>180 days” |
|------------------------------------------------|--------------------------------|---------------------------|---------------------------|------------------------|----------------------------------------------------------------------------------|---------------------------------------------------------------------------|
|                                                | 0-30 Days<br>(N=53,790)        | >30-90 Days<br>(N=50,834) | >90-180 Days<br>(N=10724) | >180 Days<br>(N=5,511) |                                                                                  |                                                                           |
|                                                | %                              | %                         | %                         | %                      |                                                                                  |                                                                           |
| <b>Imaging<sup>a</sup></b>                     |                                |                           |                           |                        |                                                                                  |                                                                           |
| CT                                             | 22.2                           | 24                        | 60.8                      | 66.9                   | 44.7                                                                             | 3.0x                                                                      |
| PET/PET-CT                                     | 3.2                            | 3.8                       | 11.1                      | 32.4                   | 29.2                                                                             | 10.1x                                                                     |
| MRI                                            | 29.6                           | 13.1                      | 35.5                      | 60                     | 30.4                                                                             | 2.0x                                                                      |
| Nuclear medicine <sup>b</sup>                  | 9.5                            | 11.3                      | 31.6                      | 59.8                   | 50.3                                                                             | 6.3x                                                                      |
| Radiology <sup>c</sup>                         | 75.5                           | 77.8                      | 91.5                      | 93.3                   | 17.8                                                                             | 1.2x                                                                      |
| Ultrasound                                     | 36.9                           | 32.4                      | 45.0                      | 51.5                   | 14.6                                                                             | 1.4x                                                                      |
| <b>Endoscopy</b>                               |                                |                           |                           |                        |                                                                                  |                                                                           |
| Endoscopy without biopsy                       | 0.0                            | 0.0                       | 0.0                       | 0.0                    | 0.0                                                                              | -                                                                         |
| Endoscopy with biopsy                          | 43.9                           | 46.7                      | 64.6                      | 27.7                   | -16.2                                                                            | 0.6x                                                                      |
| <b>Other Biopsies</b>                          |                                |                           |                           |                        |                                                                                  |                                                                           |
|                                                | 53.5                           | 56.3                      | 78.5                      | 98.3                   | 44.8                                                                             | 1.8x                                                                      |
| <b>Laboratory<sup>a</sup></b>                  |                                |                           |                           |                        |                                                                                  |                                                                           |
| Genetic Tests                                  | 31.9                           | 16.0                      | 46.5                      | 70.0                   | 38.1                                                                             | 2.2x                                                                      |
| General urine & serum tests                    | 99.9                           | 99.3                      | 97.9                      | 100.0                  | 0.1                                                                              | 1.0x                                                                      |
| Non-genetic cancer-specific lab tests          | 12.1                           | 11.8                      | 29.2                      | 49.8                   | 37.7                                                                             | 4.4x                                                                      |

<sup>a</sup> The number of imaging or laboratory procedures were counted as 1 if multiple claims for the same procedure or test were present on the same day; <sup>b</sup> Nuclear medicine includes imaging (thyroid, parathyroid, adrenal, bone marrow, spleen, lymphatic and lymph nodes, liver, spleen, hepatobiliary system, salivary, gastric mucosa, gastric emptying, acute gastrointestinal blood loss, intestine, bone and/or joint, non-cardiac vascular flow, myocardial perfusion, acute venous thrombosis, myocardial, cardiac blood pool, pulmonary ventilation, brain, cerebrospinal fluid flow, kidney, testicular) and other diagnostic nuclear medicine procedures (full code list in supplemental materials); <sup>c</sup> Radiology includes radiological examinations, x-rays, angiograms, mammograms, tomosynthesis, lymphangiography, shuntogram, splenoportography, and venography. <sup>d</sup> Time to diagnosis cohorts had variable follow-up periods. CT, computerized tomography; MRI, magnetic resonance imaging; PET, positron emission tomography

**Supplementary Table 7. Diagnostic-related Health Care Resource Utilization During the Diagnostic Pathway by TTD Among Those Diagnosed with Colorectal Cancer**

| Colorectal Cancer Patients Diagnosed<br>N= 22,649 | Time to Diagnosis <sup>d</sup> |                       |                        |                      | Absolute Difference in % Diagnostic Resource Users “0 to 30 days” vs “>180 days” | Times Change in % Diagnostic Resource Users “0 to 30 days” vs “>180 days” |
|---------------------------------------------------|--------------------------------|-----------------------|------------------------|----------------------|----------------------------------------------------------------------------------|---------------------------------------------------------------------------|
|                                                   | 0-30 Days (N=1,679)            | >30-90 Days (N=2,721) | >90-180 Days (N=8,147) | >180 Days (N=10,102) |                                                                                  |                                                                           |
|                                                   | %                              | %                     | %                      | %                    |                                                                                  |                                                                           |
| <b>Imaging<sup>a</sup></b>                        |                                |                       |                        |                      |                                                                                  |                                                                           |
| CT                                                | 68.7                           | 80.2                  | 93.3                   | 93.3                 | 24.6                                                                             | 1.4x                                                                      |
| PET/PET-CT                                        | 41.2                           | 35.3                  | 7.9                    | 7.9                  | -33.3                                                                            | 0.2x                                                                      |
| MRI                                               | 99.4                           | 84.8                  | 87.4                   | 87.4                 | -12.0                                                                            | 0.9x                                                                      |
| Nuclear medicine <sup>b</sup>                     | 54.3                           | 35.9                  | 8.0                    | 8.0                  | -46.3                                                                            | 0.1x                                                                      |
| Radiology <sup>c</sup>                            | 99.4                           | 95.3                  | 91.6                   | 91.6                 | -7.8                                                                             | 0.9x                                                                      |
| Ultrasound                                        | 0.0                            | 0.0                   | 0.0                    | 0.0                  | 0.0                                                                              | -                                                                         |
| <b>Endoscopy</b>                                  |                                |                       |                        |                      |                                                                                  |                                                                           |
| Endoscopy without biopsy                          | 58.8                           | 56.0                  | 31.2                   | 54.1                 | -4.7                                                                             | 0.9x                                                                      |
| Endoscopy with biopsy                             | 95.2                           | 92.0                  | 80.1                   | 85.5                 | -9.7                                                                             | 0.9x                                                                      |
| <b>Other Biopsies</b>                             |                                |                       |                        |                      |                                                                                  |                                                                           |
|                                                   | 74.9                           | 78.6                  | 78.9                   | 85.2                 | 10.3                                                                             | 1.1x                                                                      |
| <b>Laboratory<sup>a</sup></b>                     |                                |                       |                        |                      |                                                                                  |                                                                           |
| Genetic Tests                                     | 36.7                           | 22.4                  | 9.4                    | 10.6                 | -26.1                                                                            | 0.3x                                                                      |
| General urine & serum tests                       | 95.4                           | 96.2                  | 96.9                   | 92.9                 | -2.5                                                                             | 1.0x                                                                      |
| Non-genetic cancer-specific lab tests             | 77.9                           | 94.7                  | 78.0                   | 87.8                 | 9.9                                                                              | 1.1x                                                                      |

<sup>a</sup> The number of imaging or laboratory procedures were counted as 1 if multiple claims for the same procedure or test were present on the same day; <sup>b</sup> Nuclear medicine includes imaging (thyroid, parathyroid, adrenal, bone marrow, spleen, lymphatic and lymph nodes, liver, spleen, hepatobiliary system, salivary, gastric mucosa, gastric emptying, acute gastrointestinal blood loss, intestine, bone and/or joint, non-cardiac vascular flow, myocardial perfusion, acute venous thrombosis, myocardial, cardiac blood pool, pulmonary ventilation, brain, cerebrospinal fluid flow, kidney, testicular) and other diagnostic nuclear medicine procedures (full code list in supplemental materials); <sup>c</sup> Radiology includes radiological examinations, x-rays, angiograms, mammograms, tomosynthesis, lymphangiography, shuntogram, splenoportography, and venography. <sup>d</sup> Time to diagnosis cohorts had variable follow-up periods. CT, computerized tomography; MRI, magnetic resonance imaging; PET, positron emission tomography

**Supplementary Table 8. Diagnostic-related Health Care Resource Utilization During the Diagnostic Pathway by TTD Among Those Diagnosed with Lung Cancer**

| Lung Cancer <sup>a</sup> Patients Diagnosed<br>N= 59,801 | Time to Diagnosis <sup>c</sup> |                        |                        |                     | Absolute Difference in % Diagnostic Resource Users “0 to 30 days” vs “>180 days” | Times Change in % Diagnostic Resource Users “0 to 30 days” vs “>180 days” |
|----------------------------------------------------------|--------------------------------|------------------------|------------------------|---------------------|----------------------------------------------------------------------------------|---------------------------------------------------------------------------|
|                                                          | 0-30 Days (N=18,732)           | >30-90 Days (N=29,834) | >90-180 Days (N=5,724) | >180 Days (N=5,511) |                                                                                  |                                                                           |
|                                                          | %                              | %                      | %                      | %                   |                                                                                  |                                                                           |
| <b>Imaging<sup>b</sup></b>                               |                                |                        |                        |                     |                                                                                  |                                                                           |
| CT                                                       | 58.5                           | 73.1                   | 81.2                   | 77.0                | 18.5                                                                             | 1.3x                                                                      |
| PET/PET-CT                                               | 13.0                           | 11.1                   | 50.2                   | 53.2                | 40.2                                                                             | 4.1x                                                                      |
| MRI                                                      | 22.1                           | 25.9                   | 42.4                   | 48.9                | 26.8                                                                             | 2.2x                                                                      |
| Nuclear medicine <sup>c</sup>                            | 6.5                            | 5.3                    | 22.5                   | 23.8                | 17.3                                                                             | 3.7x                                                                      |
| Radiology <sup>d</sup>                                   | 23.5                           | 18.7                   | 78.2                   | 72.5                | 49.0                                                                             | 3.1x                                                                      |
| Ultrasound                                               | 61.5                           | 67.5                   | 60.3                   | 64.1                | 2.6                                                                              | 1.0x                                                                      |
| <b>Endoscopy</b>                                         |                                |                        |                        |                     |                                                                                  |                                                                           |
| Endoscopy without biopsy                                 | 45.5                           | 57.2                   | 65.2                   | 60.3                | 14.8                                                                             | 1.3x                                                                      |
| Endoscopy with biopsy                                    | 7.9                            | 6.7                    | 32.1                   | 32.5                | 24.6                                                                             | 4.1x                                                                      |
| <b>Other Biopsies</b>                                    |                                |                        |                        |                     |                                                                                  |                                                                           |
|                                                          | 45.4                           | 25.4                   | 66.8                   | 64.4                | 19.0                                                                             | 1.4x                                                                      |
| <b>Laboratory<sup>b</sup></b>                            |                                |                        |                        |                     |                                                                                  |                                                                           |
| Genetic Tests                                            | 4.5                            | 4.2                    | 20.7                   | 23.0                | 18.5                                                                             | 5.1x                                                                      |
| General urine & serum tests                              | 97.4                           | 91.0                   | 97.8                   | 97.0                | -0.4                                                                             | 1.0x                                                                      |
| Non-genetic cancer-specific lab tests                    | 9.8                            | 7.6                    | 33.4                   | 34.9                | 25.1                                                                             | 3.6x                                                                      |

<sup>a</sup> Lung includes bronchus; <sup>b</sup> The number of imaging or laboratory procedures were counted as 1 if multiple claims for the same procedure or test were present on the same day; <sup>c</sup> Nuclear medicine includes imaging (thyroid, parathyroid, adrenal, bone marrow, spleen, lymphatic and lymph nodes, liver, spleen, hepatobiliary system, salivary, gastric mucosa, gastric emptying, acute gastrointestinal blood loss, intestine, bone and/or joint, non-cardiac vascular flow, myocardial perfusion, acute venous thrombosis, myocardial, cardiac blood pool, pulmonary ventilation, brain, cerebrospinal fluid flow, kidney, testicular) and other diagnostic nuclear medicine procedures (full code list in supplemental materials); <sup>d</sup> Radiology includes radiological examinations, x-rays, angiograms, mammograms, tomosynthesis, lymphangiography, shuntogram, splenoportography, and venography. <sup>e</sup> Time to diagnosis cohorts had variable follow-up periods. CT, computerized tomography; MRI, magnetic resonance imaging; PET, positron emission tomography

**Supplementary Table 9. Diagnostic-related Health Care Resource Utilization During the Diagnostic Pathway by TTD Among Those Diagnosed with Ovarian Cancer**

| Ovarian Cancer Patients Diagnosed<br>N= 4,334 | Time to Diagnosis <sup>d</sup> |                       |                        |                   | Absolute Difference in % Diagnostic Resource Users “0 to 30 days” vs “>180 days” | Times Change in % Diagnostic Resource Users “0 to 30 days” vs “>180 days” |
|-----------------------------------------------|--------------------------------|-----------------------|------------------------|-------------------|----------------------------------------------------------------------------------|---------------------------------------------------------------------------|
|                                               | 0-30 Days (N=1,223)            | >30-90 Days (N=1,066) | >90-180 Days (N=1,093) | >180 Days (N=952) |                                                                                  |                                                                           |
|                                               | %                              | %                     | %                      | %                 |                                                                                  |                                                                           |
| <b>Imaging<sup>a</sup></b>                    |                                |                       |                        |                   |                                                                                  |                                                                           |
| CT                                            | 73.7                           | 80.6                  | 46.7                   | 95.1              | 21.4                                                                             | 1.3x                                                                      |
| PET/PET-CT                                    | 12.4                           | 15.5                  | 11.3                   | 33.3              | 20.9                                                                             | 2.7x                                                                      |
| MRI                                           | 25.9                           | 27.4                  | 18                     | 36.2              | 10.3                                                                             | 1.4x                                                                      |
| Nuclear medicine <sup>b</sup>                 | 11.2                           | 13.0                  | 8.8                    | 19.9              | 8.7                                                                              | 1.8x                                                                      |
| Radiology <sup>c</sup>                        | 77.8                           | 81.8                  | 44.7                   | 87.9              | 10.1                                                                             | 1.1x                                                                      |
| Ultrasound                                    | 9.2                            | 11.3                  | 12.5                   | 18.1              | 8.9                                                                              | 2.0x                                                                      |
| <b>Endoscopy</b>                              |                                |                       |                        |                   |                                                                                  |                                                                           |
| Endoscopy without biopsy                      | 0.0                            | 0.0                   | 0.0                    | 0.0               | 0.0                                                                              | -                                                                         |
| Endoscopy with biopsy                         | 18.5                           | 22.7                  | 14.7                   | 29.5              | 11.0                                                                             | 1.6x                                                                      |
| <b>Other Biopsies</b>                         |                                |                       |                        |                   |                                                                                  |                                                                           |
|                                               | 66.2                           | 68.9                  | 68.9                   | 79.0              | 12.8                                                                             | 1.2x                                                                      |
| <b>Laboratory<sup>a</sup></b>                 |                                |                       |                        |                   |                                                                                  |                                                                           |
| Genetic Tests                                 | 27.4                           | 34.4                  | 38.9                   | 42.2              | 14.8                                                                             | 1.5x                                                                      |
| General urine & serum tests                   | 94.3                           | 96.5                  | 89.8                   | 99.8              | 5.5                                                                              | 1.1x                                                                      |
| Non-genetic cancer-specific lab tests         | 83.0                           | 82.9                  | 83.6                   | 96.6              | 13.6                                                                             | 1.2x                                                                      |

<sup>a</sup> The number of imaging or laboratory procedures were counted as 1 if multiple claims for the same procedure or test were present on the same day; <sup>b</sup> Nuclear medicine includes imaging (thyroid, parathyroid, adrenal, bone marrow, spleen, lymphatic and lymph nodes, liver, spleen, hepatobiliary system, salivary, gastric mucosa, gastric emptying, acute gastrointestinal blood loss, intestine, bone and/or joint, non-cardiac vascular flow, myocardial perfusion, acute venous thrombosis, myocardial, cardiac blood pool, pulmonary ventilation, brain, cerebrospinal fluid flow, kidney, testicular) and other diagnostic nuclear medicine procedures (full code list in supplemental materials); <sup>c</sup> Radiology includes radiological examinations, x-rays, angiograms, mammograms, tomosynthesis, lymphangiography, shuntogram, splenoportography, and venography. <sup>d</sup> Time to diagnosis cohorts had variable follow-up periods. CT, computerized tomography; MRI, magnetic resonance imaging; PET, positron emission tomography

**Supplementary Table 10. Diagnostic-related Health Care Resource Utilization During the Diagnostic Pathway by TTD Among Those Diagnosed with Pancreas Cancer**

| Pancreas Cancer Patients Diagnosed<br>N= 3,061 | Time to Diagnosis <sup>d</sup> |                       |                      |                   | Absolute Difference in % Diagnostic Resource Users “0 to 30 days” vs “>180 days” | Times Change in % Diagnostic Resource Users “0 to 30 days” vs “>180 days” |
|------------------------------------------------|--------------------------------|-----------------------|----------------------|-------------------|----------------------------------------------------------------------------------|---------------------------------------------------------------------------|
|                                                | 0-30 Days (N=1,392)            | >30-90 Days (N=1,082) | >90-180 Days (N=394) | >180 Days (N=193) |                                                                                  |                                                                           |
|                                                | %                              | %                     | %                    | %                 |                                                                                  |                                                                           |
| <b>Imaging<sup>a</sup></b>                     |                                |                       |                      |                   |                                                                                  |                                                                           |
| CT                                             | 45.6                           | 73.2                  | 99.0                 | 94.8              | 49.2                                                                             | 2.1x                                                                      |
| PET/PET-CT                                     | 9.7                            | 17.2                  | 43.4                 | 99.5              | 89.8                                                                             | 10.3x                                                                     |
| MRI                                            | 23.2                           | 35.0                  | 71.3                 | 82.4              | 59.2                                                                             | 3.6x                                                                      |
| Nuclear medicine <sup>b</sup>                  | 8.0                            | 15.7                  | 28.9                 | 90.2              | 82.2                                                                             | 11.3x                                                                     |
| Radiology <sup>c</sup>                         | 39.3                           | 60.4                  | 83.5                 | 98.5              | 59.2                                                                             | 2.5x                                                                      |
| Ultrasound                                     | 7.4                            | 4.0                   | 9.6                  | 24.4              | 17.0                                                                             | 3.3x                                                                      |
| <b>Endoscopy</b>                               |                                |                       |                      |                   |                                                                                  |                                                                           |
| Endoscopy without biopsy                       | 2.1                            | 1.4                   | 4.6                  | 16.1              | 14.0                                                                             | 7.7x                                                                      |
| Endoscopy with biopsy                          | 36.8                           | 45.3                  | 70.3                 | 99.5              | 62.7                                                                             | 2.7x                                                                      |
| <b>Other Biopsies</b>                          |                                |                       |                      |                   |                                                                                  |                                                                           |
|                                                | 36.0                           | 55.8                  | 86.6                 | 90.2              | 54.2                                                                             | 2.5x                                                                      |
| <b>Laboratory<sup>a</sup></b>                  |                                |                       |                      |                   |                                                                                  |                                                                           |
| Genetic Tests                                  | 21                             | 20.9                  | 24.1                 | 84.5              | 63.5                                                                             | 4.0x                                                                      |
| General urine & serum tests                    | 85.6                           | 72.4                  | 94.9                 | 94.3              | 8.7                                                                              | 1.1x                                                                      |
| Non-genetic cancer-specific lab tests          | 24.4                           | 77                    | 75.9                 | 88.6              | 64.2                                                                             | 3.6x                                                                      |

<sup>a</sup> The number of imaging or laboratory procedures were counted as 1 if multiple claims for the same procedure or test were present on the same day; <sup>b</sup> Nuclear medicine includes imaging (thyroid, parathyroid, adrenal, bone marrow, spleen, lymphatic and lymph nodes, liver, spleen, hepatobiliary system, salivary, gastric mucosa, gastric emptying, acute gastrointestinal blood loss, intestine, bone and/or joint, non-cardiac vascular flow, myocardial perfusion, acute venous thrombosis, myocardial, cardiac blood pool, pulmonary ventilation, brain, cerebrospinal fluid flow, kidney, testicular) and other diagnostic nuclear medicine procedures (full code list in supplemental materials); <sup>c</sup> Radiology includes radiological examinations, x-rays, angiograms, mammograms, tomosynthesis, lymphangiography, shuntogram, splenoportography, and venography. <sup>d</sup> Time to diagnosis cohorts had variable follow-up periods. CT, computerized tomography; MRI, magnetic resonance imaging; PET, positron emission tomography

**Supplementary Table 11. Diagnostic-related Health Care Resource Utilization During the Diagnostic Pathway by TTD Among Those Diagnosed with Prostate Cancer**

| Prostate Cancer Patients Diagnosed<br>N= 88,417 | Time to Diagnosis <sup>d</sup> |                           |                            |                         | Absolute Difference in % Diagnostic Resource Users “0 to 30 days” vs “>180 days” | Times Change in % Diagnostic Resource Users “0 to 30 days” vs “>180 days” |
|-------------------------------------------------|--------------------------------|---------------------------|----------------------------|-------------------------|----------------------------------------------------------------------------------|---------------------------------------------------------------------------|
|                                                 | 0-30 Days<br>(N=34,179)        | >30-90 Days<br>(N=24,473) | >90-180 Days<br>(N=17,124) | >180 Days<br>(N=12,641) |                                                                                  |                                                                           |
|                                                 | %                              | %                         | %                          | %                       |                                                                                  |                                                                           |
| <b>Imaging<sup>a</sup></b>                      |                                |                           |                            |                         |                                                                                  |                                                                           |
| CT                                              | 50.0                           | 67.5                      | 50.8                       | 51.9                    | 1.9                                                                              | 1.0x                                                                      |
| PET/PET-CT                                      | 3.0                            | 4.2                       | 3.5                        | 3.7                     | 0.7                                                                              | 1.2x                                                                      |
| MRI                                             | 26.4                           | 36.3                      | 27.5                       | 19.3                    | -7.1                                                                             | 0.7x                                                                      |
| Nuclear medicine <sup>b</sup>                   | 24.3                           | 35.9                      | 28.6                       | 21.9                    | -2.4                                                                             | 0.9x                                                                      |
| Radiology <sup>c</sup>                          | 74.4                           | 71.9                      | 81.1                       | 83.4                    | 9.0                                                                              | 1.1x                                                                      |
| Ultrasound                                      | 14.6                           | 18.7                      | 21.4                       | 21.0                    | 6.4                                                                              | 1.4x                                                                      |
| <b>Endoscopy</b>                                |                                |                           |                            |                         |                                                                                  |                                                                           |
| Endoscopy without biopsy                        | 6.2                            | 8.1                       | 9.3                        | 10.8                    | 4.6                                                                              | 1.7x                                                                      |
| Endoscopy with biopsy                           | 15.1                           | 19.0                      | 13.2                       | 9.9                     | -5.2                                                                             | 0.7x                                                                      |
| <b>Other Biopsies</b>                           |                                |                           |                            |                         |                                                                                  |                                                                           |
|                                                 | 95.1                           | 97.9                      | 94.5                       | 96.4                    | 1.3                                                                              | 1.0x                                                                      |
| <b>Laboratory<sup>a</sup></b>                   |                                |                           |                            |                         |                                                                                  |                                                                           |
| Genetic Tests                                   | 2.9                            | 4.2                       | 3.5                        | 3.2                     | 0.3                                                                              | 1.1x                                                                      |
| General urine & serum tests                     | 94.8                           | 99.9                      | 99.2                       | 100.0                   | 5.2                                                                              | 1.1x                                                                      |
| Non-genetic cancer-specific lab tests           | 89.5                           | 99.2                      | 64.1                       | 39.8                    | -49.7                                                                            | 0.4x                                                                      |

<sup>a</sup> The number of imaging or laboratory procedures were counted as 1 if multiple claims for the same procedure or test were present on the same day; <sup>b</sup> Nuclear medicine includes imaging (thyroid, parathyroid, adrenal, bone marrow, spleen, lymphatic and lymph nodes, liver, spleen, hepatobiliary system, salivary, gastric mucosa, gastric emptying, acute gastrointestinal blood loss, intestine, bone and/or joint, non-cardiac vascular flow, myocardial perfusion, acute venous thrombosis, myocardial, cardiac blood pool, pulmonary ventilation, brain, cerebrospinal fluid flow, kidney, testicular) and other diagnostic nuclear medicine procedures (full code list in supplemental materials); <sup>c</sup> Radiology includes radiological examinations, x-rays, angiograms, mammograms, tomosynthesis, lymphangiography, shuntogram, splenoportography, and venography. <sup>d</sup> Time to diagnosis cohorts had variable follow-up periods. CT, computerized tomography; MRI, magnetic resonance imaging; PET, positron emission tomography
